# Supplementary material for: DNSC: a fluorescent, environmentally sensitive cytidine derivative for the direct detection of GGG triad sequences
Source: Royal Society of Chemistry journal article supplement (doi:10.1039/c3ob41222a), 2013-01-01
Supplement: c3ob41222a.pdf [file c3ob41222a.pdf]

## Supporting Information

# <sup>DNS</sup>C: A Fluorescent, Environmentally Sensitive Cytidine Derivative for the Direct Detection of GGG Triad Sequences

Ki Tae Kim,<sup>a</sup> Hyun Woo Kim,<sup>b</sup> Dohyun Moon,<sup>c</sup> Young Min Rhee,<sup>b</sup> and Byeang Hyeon Kim\*<sup>a</sup>

<sup>a</sup> Department of Chemistry, BK School of Molecular Science, Pohang University of Science and Technology, Pohang 790-784, Korea. E-mail: bhkim@postech.ac.kr;

<sup>b</sup> Department of Chemistry, BK School of Molecular Science, Center for Self-assembly and Complexity, Institute for Basic Science, Pohang University of Science and Technology (POSTECH), Pohang 790-784, South Korea. E-mail: ymrhee@postech.ac.kr;

<sup>c</sup> Beamline Division, Pohang Accelerator Laboratory, Pohang University of Science and Technology (POSTECH), Pohang 790-784, South Korea. E-mail: dmoon@postech.ac.kr

## Table of Contents

|                   |                                                                         |     |
|-------------------|-------------------------------------------------------------------------|-----|
| <b>Fig. S1 :</b>  | Basic photophysical properties of 2'-deoxycytidine and <sup>DNS</sup> C | S2  |
| <b>Fig. S2 :</b>  | NMR spectroscopic titration of <sup>DNS</sup> C                         | S3  |
| <b>Fig. S3 :</b>  | Molecular orbital (MO) transitions of <sup>DNS</sup> C                  | S4  |
| <b>Fig. S4 :</b>  | Excitation and emission spectra of <sup>DNS</sup> C in aqueous solution | S5  |
| <b>Table S1 :</b> | MALDI-TOF MS data                                                       | S6  |
| <b>Fig. S5 :</b>  | CD spectra of single-stranded DNS-C and its duplex forms                | S7  |
| <b>Fig. S6 :</b>  | UV absorption spectra of DNS-N strands                                  | S8  |
| <b>Fig. S7 :</b>  | Fluorescence spectra of DNS-N sequences I                               | S9  |
| <b>Fig. S8 :</b>  | Fluorescence spectra of DNS-N sequences II                              | S10 |
| <b>Table S2 :</b> | Crystal data and structure refinement for <sup>DNS</sup> C              | S11 |
| <b>Table S3 :</b> | Atomic coordinates and equivalent isotropic displacement parameters     | S12 |
| <b>Table S4 :</b> | Bond lengths and angles                                                 | S13 |
| <b>Table S5 :</b> | Anisotropic displacement parameters                                     | S18 |
| <b>Table S6 :</b> | Hydrogen bonds for <sup>DNS</sup> C                                     | S19 |
| <b>Fig. S9 :</b>  | Solid state structure of <sup>DNS</sup> C                               | S20 |

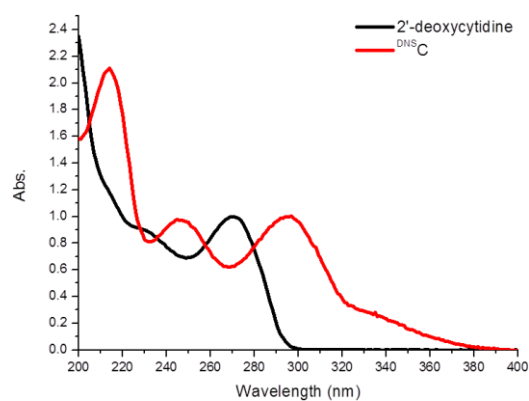

(a)

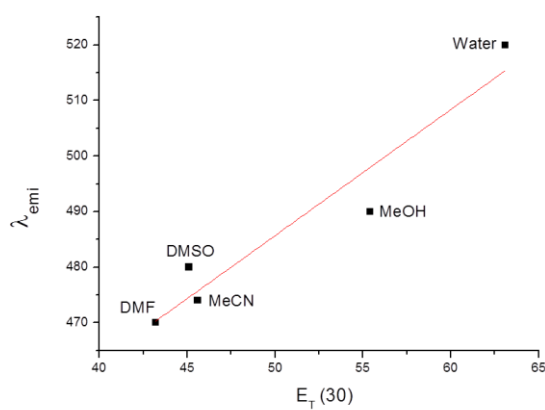

(b)

**Fig. S1** (a) UV absorption of 2'-deoxycytidine and <sup>DNS</sup>C (5  $\mu$ M; total volume: 1 mL; 20 °C) (b) Plot of fluorescence emission wavelength of <sup>DNS</sup>C versus the ET(30) values.

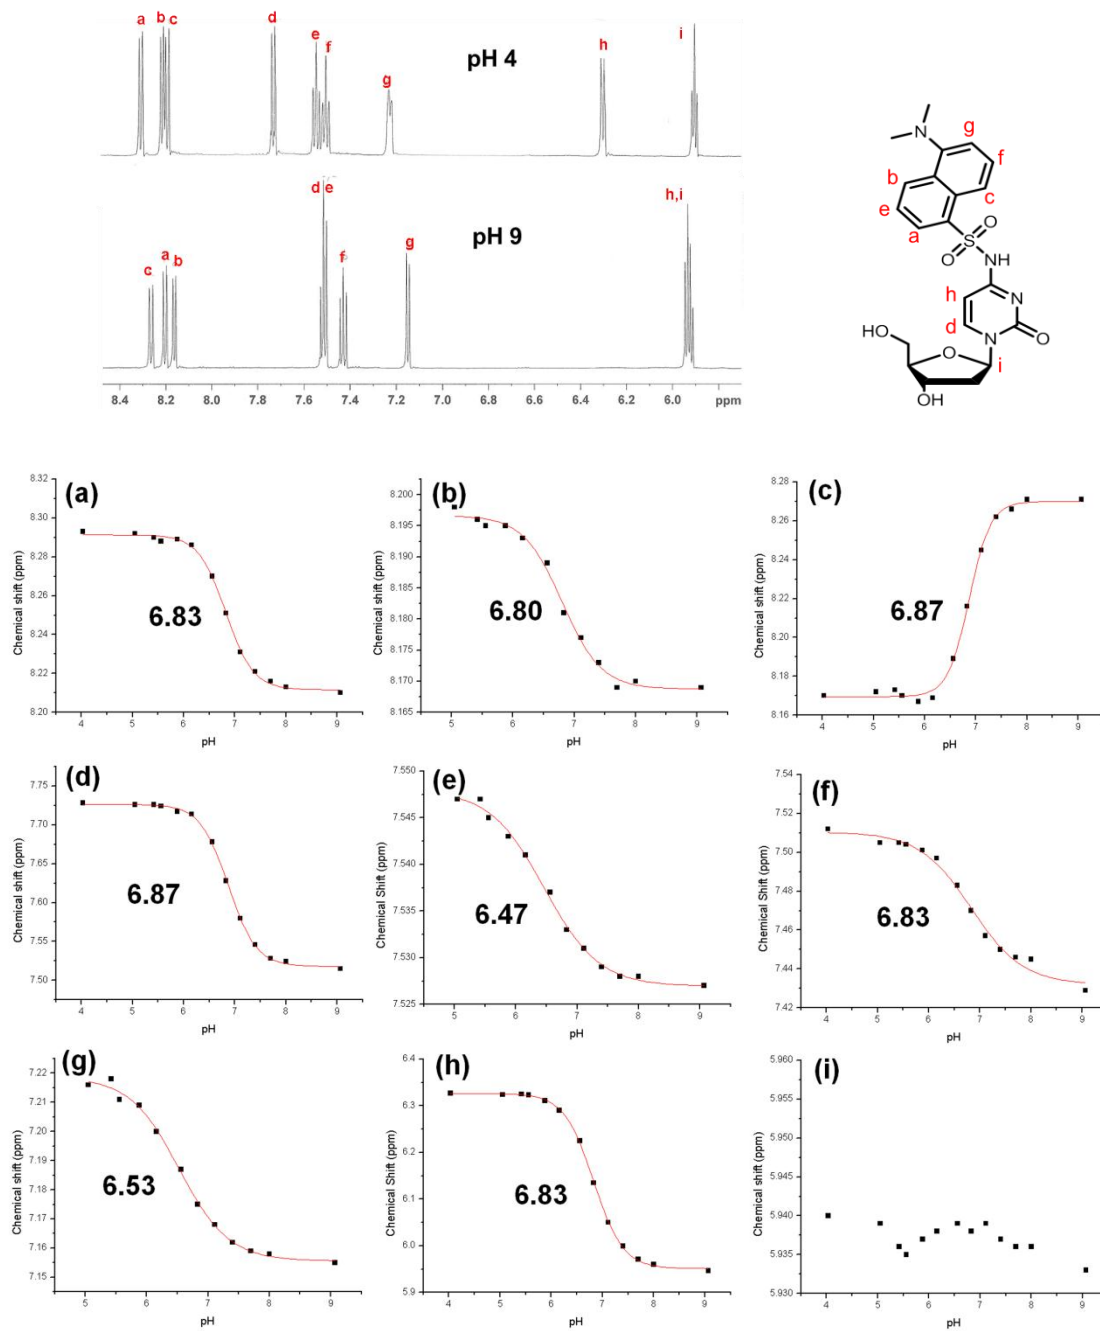

**Fig. S2** NMR spectroscopic titration of <sup>13</sup>C-DNS-C. The transition pH appeared at pH 6.8, which is the  $pK_a$  of the N3 position of <sup>13</sup>C-DNS-C. Signals were assigned from 2D COSY and HSQC spectra (buffer: 200 mM trizma; 10% DMSO-*d*<sub>6</sub>; 3 mM <sup>13</sup>C-DNS-C, 600  $\mu$ L).

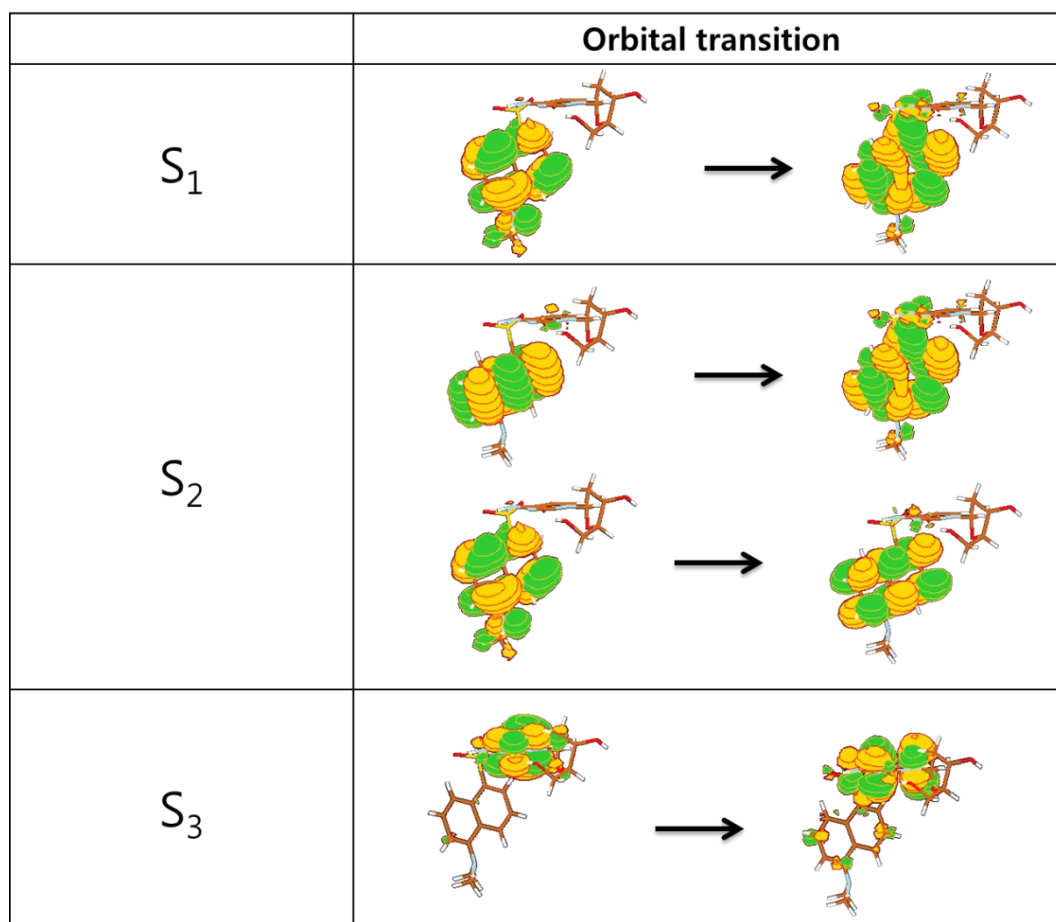

**Fig. S3** Molecular orbital (MO) transitions of  ${}^{\text{DNS}}\text{C}$  that contributed significantly to the excited states  $S_1$ ,  $S_2$ , and  $S_3$ .

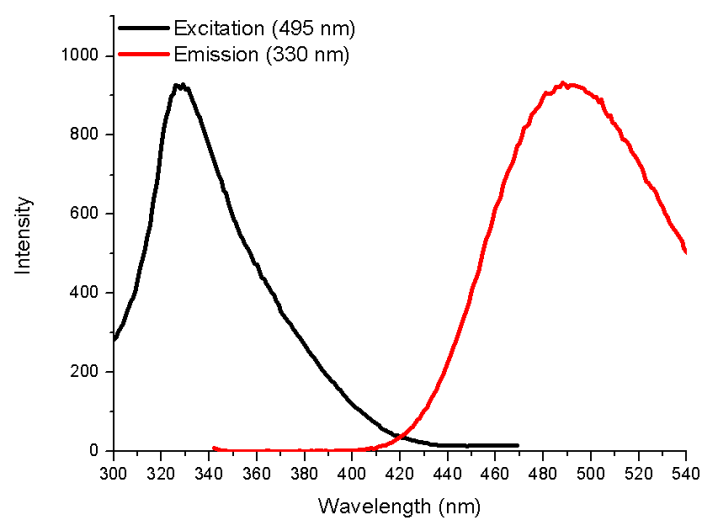

**Fig. S4** Excitation and emission spectra of <sup>DNS</sup>C in aqueous solution.  $E_{00}$ : 420 nm (3.4 mM <sup>DNS</sup>C, 100 mM KCl, 50% MeOH).

| ODN name  | Sequence (5' to 3')                                             | Exact mass | Obs. mass |
|-----------|-----------------------------------------------------------------|------------|-----------|
| ODN-A-A   | CGA GAA AAA AAG AGC                                             | 4655.1002  | 4655.4605 |
| ODN-A-C   | CGA GAA CAC AAG AGC                                             | 4606.3002  | 4606.9386 |
| ODN-A-G   | CGA GAA GAG AAG AGC                                             | 4686.3002  | 4686.8933 |
| ODN-A-T   | CGA GAA TAT AAG AGC                                             | 4636.3002  | 4637.1941 |
| ODN-C-A   | CGA GAA ACA AAG AGC                                             | 4630.7002  | 4630.3345 |
| ODN-C-C   | CGA GAA CCC AAG AGC                                             | 4581.9002  | 4580.9557 |
| ODN-C-G   | CGA GAA GCG AAG AGC                                             | 4661.9002  | 4661.9299 |
| ODN-C-T   | CGA GAA TCT AAG AGC                                             | 4611.9002  | 4612.1425 |
| ODN-G-A   | CGA GAA AGA AAG AGC                                             | 4670.7002  | 4670.1179 |
| ODN-G-C   | CGA GAA CGC AAG AGC                                             | 4621.9002  | 4621.5972 |
| ODN-G-G   | CGA GAA GGG AAG AGC                                             | 4701.9002  | 4701.8273 |
| ODN-G-T   | CGA GAA TGT AAG AGC                                             | 4651.9002  | 4651.361  |
| ODN-T-A   | CGA GAA ATA AAG AGC                                             | 4645.7002  | 4645.1594 |
| ODN-T-C   | CGA GAA CTC AAG AGC                                             | 4596.9002  | 4596.9012 |
| ODN-T-G   | CGA GAA GTG AAG AGC                                             | 4676.9002  | 4676.8234 |
| ODN-T-T   | CGA GAA TTT AAG AGC                                             | 4626.9002  | 4626.8861 |
| DNS-A     | GCT CTT A <sup>DNS</sup> CA TTC TCG                             | 4727.6037  | 4727.8698 |
| DNS-C     | GCT CTT C <sup>DNS</sup> CC TTC TCG                             | 4678.8037  | 4679.0445 |
| DNS-G     | GCT CTT G <sup>DNS</sup> CG TTC TCG                             | 4758.8037  | 4758.4107 |
| DNS-T     | GCT CTT T <sup>DNS</sup> CT TTC TCG                             | 4708.8037  | 4709.1509 |
| Nat-A     | GCT CTT ACA TTC TCG                                             | 4494.3002  | 4494.4445 |
| Nat-C     | GCT CTT CCC TTC TCG                                             | 4445.5002  | 4445.4753 |
| Nat-G     | GCT CTT GCG TTC TCG                                             | 4525.5002  | 4525.4412 |
| Nat-T     | GCT CTT TCT TTC TCG                                             | 4475.5002  | 4475.3688 |
| DNS-probe | A CCC TAA C <sup>DNS</sup> CC TAA C <sup>DNS</sup> CC TAA CCC T | 7286.2216  | 7285.9761 |
| Htelo     | A(GGGTTA) <sub>3</sub> GGGT                                     | 7271.4146  | 7271.0071 |

**Table S1** ODN sequences and their MALDI-TOF MS data.

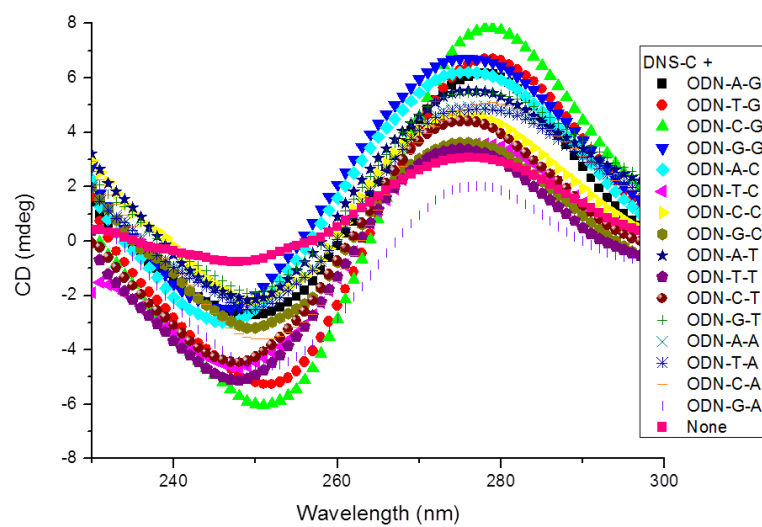

**Fig. S5** CD spectra of single-stranded **DNS-C** and its duplex forms with **ODN-X-Y** sequence incorporating various triads [**ODN-X-Y**: -YXY-; sample concentration, 1.5  $\mu$ M; buffer, 100 mM tris (pH 9.0); 20  $^{\circ}$ C; total volume, 1 mL].

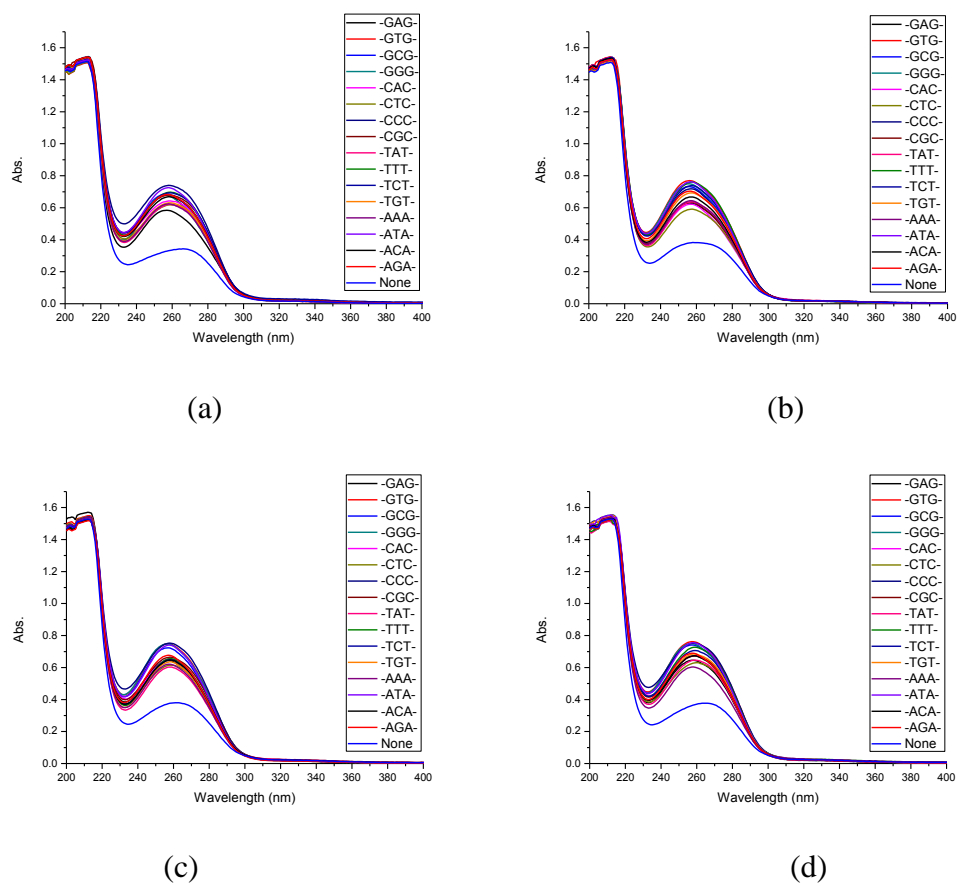

**Fig. S6** UV absorption spectra of single-stranded **DNS-N** strands and of their duplexes with **ODN-X-Y** sequences with various triads: (a) DNS-C, (b) DNS-G, (c) DNS-A, (d) DNS-T (**ODN-X-Y**: -YXY-; sample concentration, 1.5  $\mu$ M; buffer, 100 mM tris (pH 9.0); excitation: 295 nm; total volume, 1 mL).



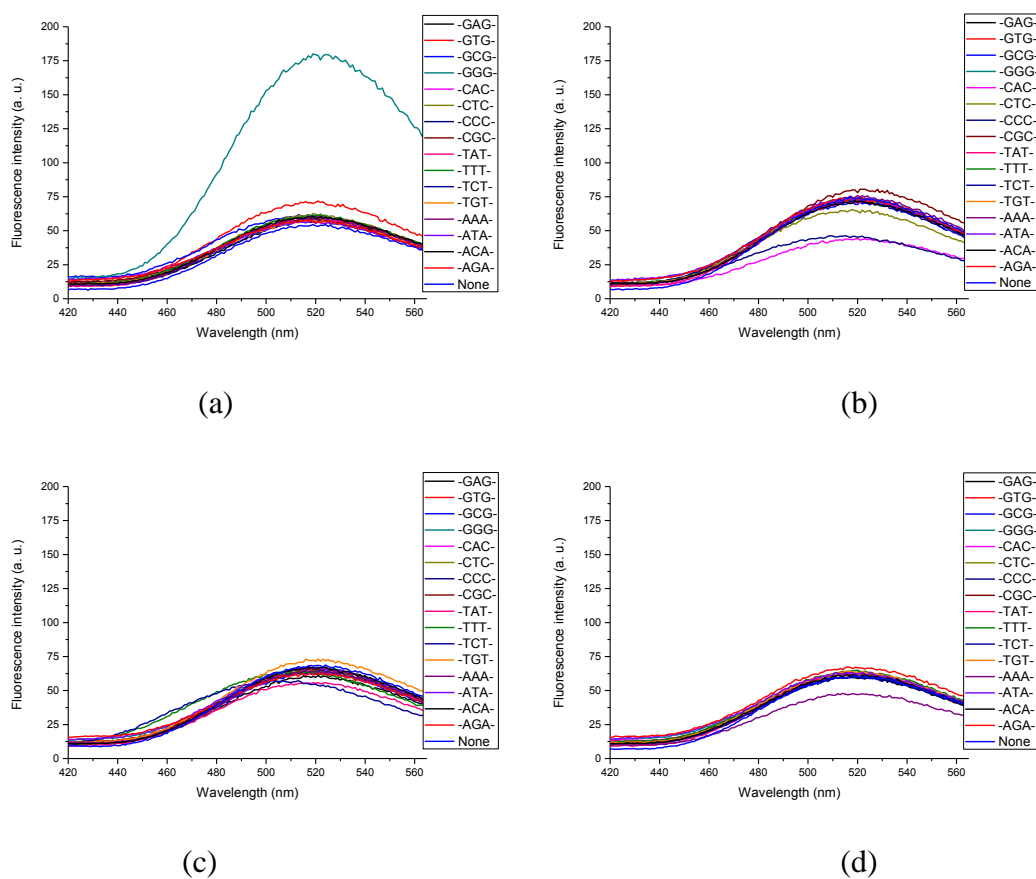

**Fig. S7** Fluorescence spectra of single-stranded **DNS-N** sequences and their duplexes with **ODN-X-Y** sequences with various triads: (a) DNS-C, (b) DNS-G, (c) DNS-A, (d) DNS-T (**ODN-X-Y**: -YXY-; sample concentration, 1.5  $\mu$ M; buffer, 100 mM tris (pH 9.0); excitation: 295 nm; total volume, 1 mL; excitation and emission slit : 10 nm).

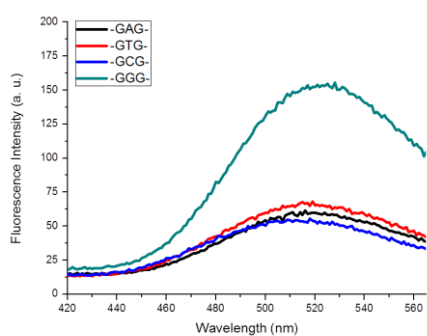

(a)

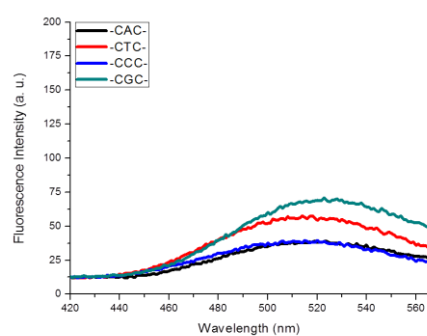

(b)

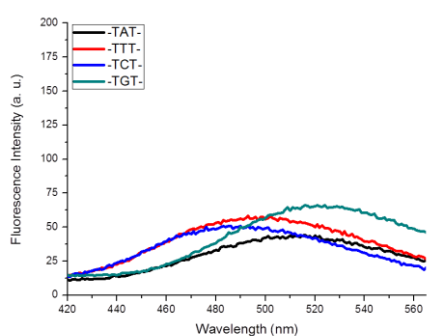

(c)

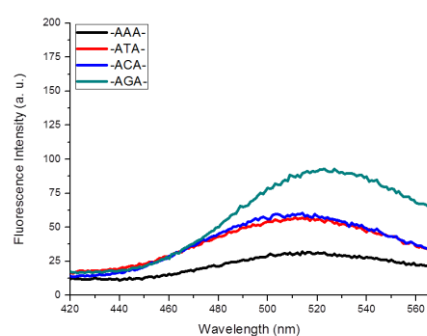

(d)

**Fig. S8** Fluorescence spectra of single-stranded **DNS-N** sequences and their duplexes with **ODN-X-Y** sequences with various triads: (a) DNS-C, (b) DNS-G, (c) DNS-A, (d) DNS-T (**ODN-X-Y**: -YXY-; sample concentration, 1.5  $\mu$ M; buffer, 100 mM tris (pH 9.0), 100 mM NaCl, 20 mM  $MgCl_2$ ; excitation, 295 nm; total volume, 1 mL; excitation and emission slit : 10 nm).

**Table S2.** Crystal data and structure refinement for <sup>DNS</sup>C

|                                                     |                                                                 |                          |
|-----------------------------------------------------|-----------------------------------------------------------------|--------------------------|
| Empirical formula                                   | C <sub>21</sub> H <sub>24</sub> N <sub>4</sub> O <sub>6</sub> S |                          |
| Formula weight                                      | 460.50                                                          |                          |
| Temperature                                         | 100(2) K                                                        |                          |
| Wavelength                                          | 0.72999 Å                                                       |                          |
| Crystal system                                      | Monoclinic                                                      |                          |
| Space group                                         | P2 <sub>1</sub>                                                 |                          |
| Unit cell dimensions                                | $a = 8.2280(16) \text{ \AA}$                                    | $\alpha = 90^\circ$      |
|                                                     | $b = 8.3500(17) \text{ \AA}$                                    | $\beta = 99.90(3)^\circ$ |
|                                                     | $c = 15.938(3) \text{ \AA}$                                     | $\gamma = 90^\circ$      |
| Volume                                              | 1078.7(4) Å <sup>3</sup>                                        |                          |
| Z                                                   | 2                                                               |                          |
| Density (calculated)                                | 1.418 Mg/m <sup>3</sup>                                         |                          |
| Absorption coefficient                              | 0.167 mm <sup>-1</sup>                                          |                          |
| F(000)                                              | 484                                                             |                          |
| Crystal size                                        | 0.04 × 0.04 × 0.02 mm <sup>3</sup>                              |                          |
| Theta range for data collection                     | 2.66–28.00°                                                     |                          |
| Index ranges                                        | -10 ≤ <i>h</i> ≤ 10; -10 ≤ <i>k</i> ≤ 10; -19 ≤ <i>l</i> ≤ 19   |                          |
| Reflections collected                               | 8814                                                            |                          |
| Independent reflections                             | 4600 [ <i>R</i> (int) = 0.0281]                                 |                          |
| Completeness to theta = 28.00°                      | 94.7%                                                           |                          |
| Absorption correction                               | Empirical                                                       |                          |
| Max. and min. transmissions                         | 0.9967 and 0.9933                                               |                          |
| Refinement method                                   | Full-matrix least-squares on <i>F</i> <sup>2</sup>              |                          |
| Data / restraints / parameters                      | 4600 / 1 / 294                                                  |                          |
| Goodness-of-fit on <i>F</i> <sup>2</sup>            | 1.061                                                           |                          |
| Final <i>R</i> indices [ <i>I</i> > 2σ( <i>I</i> )] | <i>R</i> 1 = 0.0385; <i>wR</i> 2 = 0.1072                       |                          |
| <i>R</i> indices (all data)                         | <i>R</i> 1 = 0.0434; <i>wR</i> 2 = 0.1091                       |                          |
| Absolute structure parameter                        | -0.01(6)                                                        |                          |
| Extinction coefficient                              | 0.078(6)                                                        |                          |
| Largest diff. peak and hole                         | 0.886 and -0.439 e/Å <sup>-3</sup>                              |                          |

**Table S3.** Atomic coordinates ( $\times 10^4$ ) and equivalent isotropic displacement parameters ( $\text{\AA}^2 \times 10^3$ ) for <sup>DN</sup>S<sub>2</sub>C. U(eq) is defined as one third of the trace of the orthogonalized U<sup>ij</sup> tensor.

|       | x        | y        | z        | U(eq) |
|-------|----------|----------|----------|-------|
| S(1)  | 6028(1)  | 9118(1)  | 2223(1)  | 21(1) |
| O(1)  | 5991(2)  | 10848(2) | 2251(1)  | 25(1) |
| O(2)  | 7627(2)  | 8382(2)  | 2302(1)  | 27(1) |
| O(3)  | 2254(2)  | 4973(2)  | 4323(1)  | 33(1) |
| O(4)  | 1721(2)  | 2095(2)  | 3286(1)  | 24(1) |
| O(5)  | 2731(2)  | -1035(2) | 4690(1)  | 30(1) |
| O(6)  | -501(2)  | 2905(2)  | 4397(1)  | 38(1) |
| N(1)  | -5(2)    | 8940(2)  | -1009(1) | 28(1) |
| N(2)  | 5020(2)  | 8535(2)  | 2955(1)  | 23(1) |
| N(3)  | 3732(2)  | 6646(2)  | 3623(1)  | 24(1) |
| N(4)  | 3930(2)  | 3879(2)  | 3456(1)  | 22(1) |
| C(1)  | -1793(3) | 8933(4)  | -1201(2) | 39(1) |
| C(2)  | 648(3)   | 10000(4) | -1601(2) | 39(1) |
| C(3)  | 691(2)   | 9162(3)  | -141(1)  | 24(1) |
| C(4)  | -194(2)  | 9775(3)  | 445(1)   | 26(1) |
| C(5)  | 566(2)   | 10006(3) | 1299(1)  | 26(1) |
| C(6)  | 2190(2)  | 9666(2)  | 1570(1)  | 24(1) |
| C(7)  | 3145(2)  | 8973(2)  | 996(1)   | 21(1) |
| C(8)  | 2373(2)  | 8671(2)  | 138(1)   | 23(1) |
| C(9)  | 3263(3)  | 7824(2)  | -408(1)  | 26(1) |
| C(10) | 4861(3)  | 7371(3)  | -151(1)  | 27(1) |
| C(11) | 5677(2)  | 7758(2)  | 672(1)   | 25(1) |
| C(12) | 4844(2)  | 8537(2)  | 1233(1)  | 21(1) |
| C(13) | 4795(2)  | 7000(2)  | 3076(1)  | 22(1) |
| C(14) | 5488(3)  | 5647(2)  | 2714(1)  | 26(1) |
| C(15) | 5030(2)  | 4166(3)  | 2915(1)  | 27(1) |
| C(16) | 3241(3)  | 5143(2)  | 3837(1)  | 24(1) |
| C(17) | 3435(2)  | 2222(2)  | 3592(1)  | 23(1) |
| C(18) | 3742(3)  | 1654(3)  | 4514(1)  | 31(1) |
| C(19) | 2250(3)  | 604(2)   | 4593(1)  | 28(1) |
| C(20) | 1025(3)  | 899(2)   | 3759(1)  | 25(1) |
| C(21) | -648(3)  | 1507(3)  | 3878(2)  | 33(1) |

**Table S4.** Bond lengths [Å] and angles [°] for <sup>DNS</sup>C.

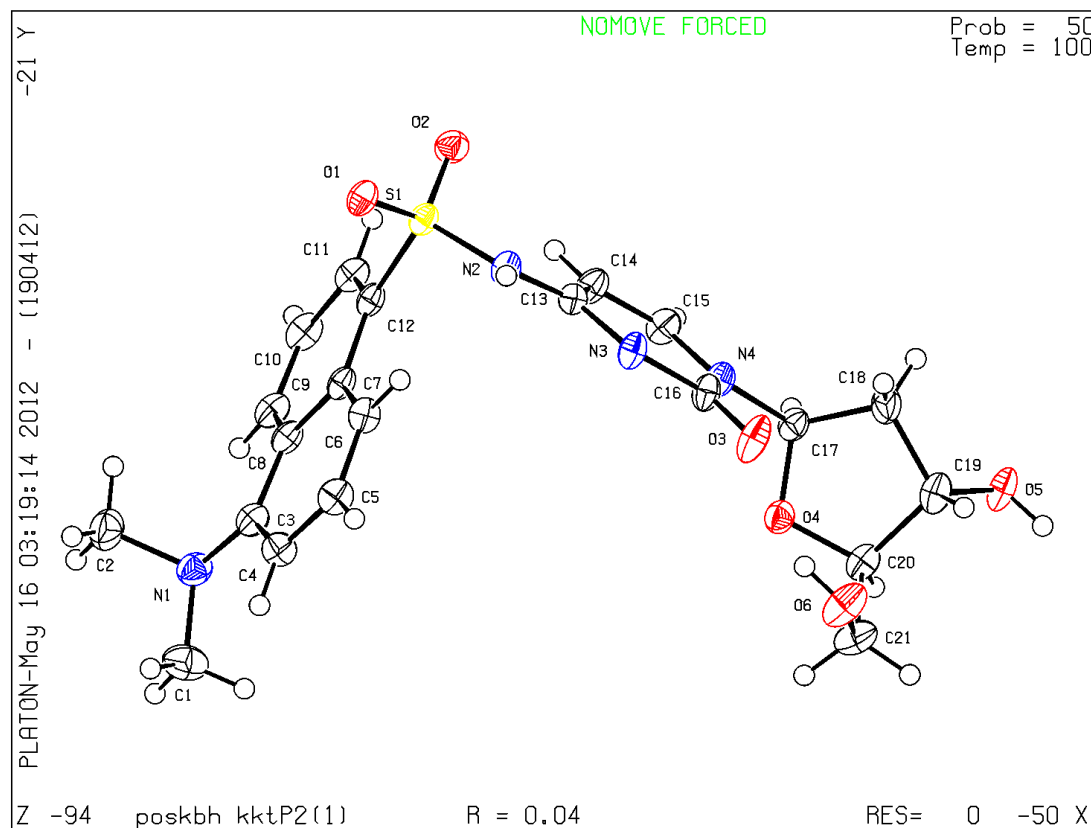

|            |            |
|------------|------------|
| S(1)-O(2)  | 1.4377(15) |
| S(1)-O(1)  | 1.4460(15) |
| S(1)-N(2)  | 1.6177(18) |
| S(1)-C(12) | 1.774(2)   |
| O(3)-C(16) | 1.222(3)   |
| O(4)-C(17) | 1.415(2)   |
| O(4)-C(20) | 1.429(2)   |
| O(5)-C(19) | 1.426(2)   |
| O(5)-H(5)  | 0.8400     |
| O(6)-C(21) | 1.424(3)   |
| O(6)-H(6)  | 0.8400     |
| N(1)-C(3)  | 1.415(3)   |
| N(1)-C(1)  | 1.450(3)   |
| N(1)-C(2)  | 1.463(3)   |
| N(2)-C(13) | 1.313(3)   |
| N(2)-H(2)  | 0.8800     |
| N(3)-C(13) | 1.370(3)   |

|              |          |
|--------------|----------|
| N(3)-C(16)   | 1.379(3) |
| N(4)-C(15)   | 1.375(2) |
| N(4)-C(16)   | 1.387(2) |
| N(4)-C(17)   | 1.469(2) |
| C(1)-H(1A)   | 0.9800   |
| C(1)-H(1B)   | 0.9800   |
| C(1)-H(1C)   | 0.9800   |
| C(2)-H(2A)   | 0.9800   |
| C(2)-H(2B)   | 0.9800   |
| C(2)-H(2C)   | 0.9800   |
| C(3)-C(4)    | 1.377(3) |
| C(3)-C(8)    | 1.438(3) |
| C(4)-C(5)    | 1.409(3) |
| C(4)-H(4)    | 0.9500   |
| C(5)-C(6)    | 1.361(3) |
| C(5)-H(5A)   | 0.9500   |
| C(6)-C(7)    | 1.428(3) |
| C(6)-H(6A)   | 0.9500   |
| C(7)-C(8)    | 1.429(3) |
| C(7)-C(12)   | 1.431(3) |
| C(8)-C(9)    | 1.419(3) |
| C(9)-C(10)   | 1.362(3) |
| C(9)-H(9)    | 0.9500   |
| C(10)-C(11)  | 1.405(3) |
| C(10)-H(10)  | 0.9500   |
| C(11)-C(12)  | 1.379(3) |
| C(11)-H(11)  | 0.9500   |
| C(13)-C(14)  | 1.431(3) |
| C(14)-C(15)  | 1.347(3) |
| C(14)-H(14)  | 0.9500   |
| C(15)-H(15)  | 0.9500   |
| C(17)-C(18)  | 1.523(3) |
| C(17)-H(17)  | 1.0000   |
| C(18)-C(19)  | 1.532(3) |
| C(18)-H(18A) | 0.9900   |
| C(18)-H(18B) | 0.9900   |
| C(19)-C(20)  | 1.544(3) |
| C(19)-H(19)  | 1.0000   |
| C(20)-C(21)  | 1.509(3) |

|                  |            |
|------------------|------------|
| C(20)-H(20)      | 1.0000     |
| C(21)-H(21A)     | 0.9900     |
| C(21)-H(21B)     | 0.9900     |
| O(2)-S(1)-O(1)   | 116.63(9)  |
| O(2)-S(1)-N(2)   | 112.54(9)  |
| O(1)-S(1)-N(2)   | 105.24(9)  |
| O(2)-S(1)-C(12)  | 108.37(9)  |
| O(1)-S(1)-C(12)  | 106.78(9)  |
| N(2)-S(1)-C(12)  | 106.72(9)  |
| C(17)-O(4)-C(20) | 109.71(15) |
| C(19)-O(5)-H(5)  | 109.5      |
| C(21)-O(6)-H(6)  | 109.5      |
| C(3)-N(1)-C(1)   | 115.65(17) |
| C(3)-N(1)-C(2)   | 114.85(17) |
| C(1)-N(1)-C(2)   | 109.70(18) |
| C(13)-N(2)-S(1)  | 120.13(15) |
| C(13)-N(2)-H(2)  | 119.9      |
| S(1)-N(2)-H(2)   | 119.9      |
| C(13)-N(3)-C(16) | 126.89(17) |
| C(15)-N(4)-C(16) | 120.34(17) |
| C(15)-N(4)-C(17) | 119.06(16) |
| C(16)-N(4)-C(17) | 120.53(16) |
| N(1)-C(1)-H(1A)  | 109.5      |
| N(1)-C(1)-H(1B)  | 109.5      |
| H(1A)-C(1)-H(1B) | 109.5      |
| N(1)-C(1)-H(1C)  | 109.5      |
| H(1A)-C(1)-H(1C) | 109.5      |
| H(1B)-C(1)-H(1C) | 109.5      |
| N(1)-C(2)-H(2A)  | 109.5      |
| N(1)-C(2)-H(2B)  | 109.5      |
| H(2A)-C(2)-H(2B) | 109.5      |
| N(1)-C(2)-H(2C)  | 109.5      |
| H(2A)-C(2)-H(2C) | 109.5      |
| H(2B)-C(2)-H(2C) | 109.5      |
| C(4)-C(3)-N(1)   | 122.63(18) |
| C(4)-C(3)-C(8)   | 119.29(18) |
| N(1)-C(3)-C(8)   | 118.05(17) |
| C(3)-C(4)-C(5)   | 120.45(18) |

|                   |            |
|-------------------|------------|
| C(3)-C(4)-H(4)    | 119.8      |
| C(5)-C(4)-H(4)    | 119.8      |
| C(6)-C(5)-C(4)    | 121.79(18) |
| C(6)-C(5)-H(5A)   | 119.1      |
| C(4)-C(5)-H(5A)   | 119.1      |
| C(5)-C(6)-C(7)    | 119.94(18) |
| C(5)-C(6)-H(6A)   | 120.0      |
| C(7)-C(6)-H(6A)   | 120.0      |
| C(6)-C(7)-C(8)    | 118.81(17) |
| C(6)-C(7)-C(12)   | 123.69(17) |
| C(8)-C(7)-C(12)   | 117.49(16) |
| C(9)-C(8)-C(7)    | 118.91(18) |
| C(9)-C(8)-C(3)    | 121.59(18) |
| C(7)-C(8)-C(3)    | 119.43(17) |
| C(10)-C(9)-C(8)   | 121.81(19) |
| C(10)-C(9)-H(9)   | 119.1      |
| C(8)-C(9)-H(9)    | 119.1      |
| C(9)-C(10)-C(11)  | 119.97(18) |
| C(9)-C(10)-H(10)  | 120.0      |
| C(11)-C(10)-H(10) | 120.0      |
| C(12)-C(11)-C(10) | 120.17(18) |
| C(12)-C(11)-H(11) | 119.9      |
| C(10)-C(11)-H(11) | 119.9      |
| C(11)-C(12)-C(7)  | 121.38(18) |
| C(11)-C(12)-S(1)  | 116.57(15) |
| C(7)-C(12)-S(1)   | 121.84(14) |
| N(2)-C(13)-N(3)   | 115.18(18) |
| N(2)-C(13)-C(14)  | 129.44(19) |
| N(3)-C(13)-C(14)  | 115.38(17) |
| C(15)-C(14)-C(13) | 118.80(18) |
| C(15)-C(14)-H(14) | 120.6      |
| C(13)-C(14)-H(14) | 120.6      |
| C(14)-C(15)-N(4)  | 123.41(19) |
| C(14)-C(15)-H(15) | 118.3      |
| N(4)-C(15)-H(15)  | 118.3      |
| O(3)-C(16)-N(3)   | 121.14(18) |
| O(3)-C(16)-N(4)   | 123.71(18) |
| N(3)-C(16)-N(4)   | 115.15(17) |
| O(4)-C(17)-N(4)   | 107.76(15) |



|                     |            |
|---------------------|------------|
| O(4)-C(17)-C(18)    | 107.39(16) |
| N(4)-C(17)-C(18)    | 115.56(17) |
| O(4)-C(17)-H(17)    | 108.6      |
| N(4)-C(17)-H(17)    | 108.6      |
| C(18)-C(17)-H(17)   | 108.6      |
| C(17)-C(18)-C(19)   | 104.84(17) |
| C(17)-C(18)-H(18A)  | 110.8      |
| C(19)-C(18)-H(18A)  | 110.8      |
| C(17)-C(18)-H(18B)  | 110.8      |
| C(19)-C(18)-H(18B)  | 110.8      |
| H(18A)-C(18)-H(18B) | 108.9      |
| O(5)-C(19)-C(18)    | 110.31(17) |
| O(5)-C(19)-C(20)    | 111.97(17) |
| C(18)-C(19)-C(20)   | 104.54(17) |
| O(5)-C(19)-H(19)    | 110.0      |
| C(18)-C(19)-H(19)   | 110.0      |
| C(20)-C(19)-H(19)   | 110.0      |
| O(4)-C(20)-C(21)    | 106.76(17) |
| O(4)-C(20)-C(19)    | 107.71(16) |
| C(21)-C(20)-C(19)   | 114.85(18) |
| O(4)-C(20)-H(20)    | 109.1      |
| C(21)-C(20)-H(20)   | 109.1      |
| C(19)-C(20)-H(20)   | 109.1      |
| O(6)-C(21)-C(20)    | 111.11(18) |
| O(6)-C(21)-H(21A)   | 109.4      |
| C(20)-C(21)-H(21A)  | 109.4      |
| O(6)-C(21)-H(21B)   | 109.4      |
| C(20)-C(21)-H(21B)  | 109.4      |
| H(21A)-C(21)-H(21B) | 108.0      |

---

Symmetry transformations used to generate equivalent atoms:

**Table S5.** Anisotropic displacement parameters ( $\text{\AA}^2 \times 10^3$ ) for <sup>DNS</sup>C. The anisotropic displacement factor exponent takes the form:  $-2\pi [ h^2 a^{*2} U^{11} + \dots + 2 h k a^* b^* U^{12} ]$

|       | U <sup>11</sup> | U <sup>22</sup> | U <sup>33</sup> | U <sup>23</sup> | U <sup>13</sup> | U <sup>12</sup> |
|-------|-----------------|-----------------|-----------------|-----------------|-----------------|-----------------|
| S(1)  | 24(1)           | 17(1)           | 25(1)           | 1(1)            | 8(1)            | 0(1)            |
| O(1)  | 31(1)           | 16(1)           | 28(1)           | 0(1)            | 9(1)            | -3(1)           |
| O(2)  | 23(1)           | 27(1)           | 33(1)           | 2(1)            | 7(1)            | 2(1)            |
| O(3)  | 54(1)           | 20(1)           | 34(1)           | -2(1)           | 27(1)           | -4(1)           |
| O(4)  | 27(1)           | 25(1)           | 21(1)           | 2(1)            | 6(1)            | -2(1)           |
| O(5)  | 43(1)           | 18(1)           | 34(1)           | 5(1)            | 21(1)           | 0(1)            |
| O(6)  | 42(1)           | 25(1)           | 54(1)           | -7(1)           | 29(1)           | -2(1)           |
| N(1)  | 28(1)           | 31(1)           | 25(1)           | -3(1)           | 5(1)            | -6(1)           |
| N(2)  | 28(1)           | 18(1)           | 24(1)           | 0(1)            | 10(1)           | 2(1)            |
| N(3)  | 32(1)           | 17(1)           | 24(1)           | 1(1)            | 12(1)           | 0(1)            |
| N(4)  | 28(1)           | 16(1)           | 24(1)           | 0(1)            | 8(1)            | 0(1)            |
| C(1)  | 31(1)           | 50(2)           | 34(1)           | -9(1)           | 2(1)            | -1(1)           |
| C(2)  | 46(1)           | 43(1)           | 27(1)           | 5(1)            | 5(1)            | -11(1)          |
| C(3)  | 26(1)           | 19(1)           | 26(1)           | -3(1)           | 7(1)            | -2(1)           |
| C(4)  | 26(1)           | 26(1)           | 28(1)           | -2(1)           | 6(1)            | 3(1)            |
| C(5)  | 28(1)           | 26(1)           | 27(1)           | -5(1)           | 12(1)           | 3(1)            |
| C(6)  | 29(1)           | 23(1)           | 21(1)           | -3(1)           | 9(1)            | 2(1)            |
| C(7)  | 25(1)           | 14(1)           | 25(1)           | 1(1)            | 11(1)           | 0(1)            |
| C(8)  | 27(1)           | 18(1)           | 26(1)           | -2(1)           | 10(1)           | -3(1)           |
| C(9)  | 30(1)           | 22(1)           | 27(1)           | -5(1)           | 11(1)           | -5(1)           |
| C(10) | 33(1)           | 22(1)           | 30(1)           | -7(1)           | 16(1)           | -1(1)           |
| C(11) | 25(1)           | 18(1)           | 35(1)           | -1(1)           | 13(1)           | 2(1)            |
| C(12) | 26(1)           | 15(1)           | 25(1)           | 1(1)            | 10(1)           | 0(1)            |
| C(13) | 23(1)           | 21(1)           | 22(1)           | 1(1)            | 4(1)            | 0(1)            |
| C(14) | 28(1)           | 23(1)           | 33(1)           | 0(1)            | 15(1)           | 1(1)            |
| C(15) | 28(1)           | 20(1)           | 34(1)           | -1(1)           | 11(1)           | 2(1)            |
| C(16) | 34(1)           | 16(1)           | 22(1)           | 0(1)            | 8(1)            | -2(1)           |
| C(17) | 27(1)           | 15(1)           | 29(1)           | 0(1)            | 7(1)            | -1(1)           |
| C(18) | 41(1)           | 21(1)           | 29(1)           | 5(1)            | -1(1)           | -6(1)           |
| C(19) | 39(1)           | 19(1)           | 28(1)           | 0(1)            | 14(1)           | 2(1)            |
| C(20) | 32(1)           | 19(1)           | 26(1)           | -5(1)           | 12(1)           | -3(1)           |
| C(21) | 29(1)           | 28(1)           | 44(1)           | -8(1)           | 13(1)           | -5(1)           |

**Table S6** Hydrogen bonds for <sup>DNS</sup>C [Å and °].

| D-H...A            | <i>d</i> (D-H) | <i>d</i> (H...A) | <i>d</i> (D...A) | <(DHA) |
|--------------------|----------------|------------------|------------------|--------|
| O(5)-H(5)...O(6)#1 | 0.84           | 1.86             | 2.681(2)         | 165.3  |
| O(6)-H(6)...O(3)   | 0.84           | 2.09             | 2.869(2)         | 154.4  |

Symmetry transformations used to generate equivalent atoms:

#1  $-x, y - 1/2, -z + 1$

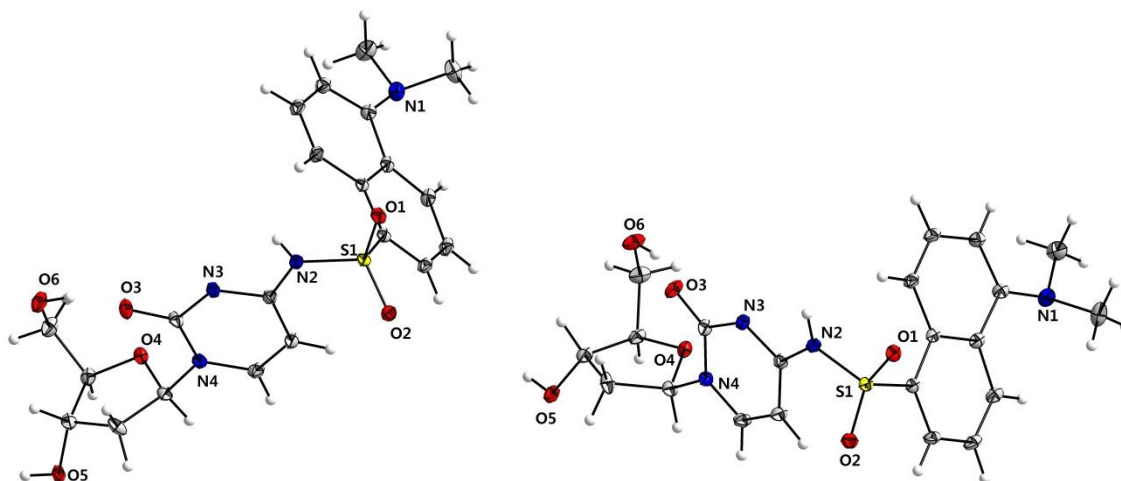

**Fig. S9** Solid state structure of <sup>DNS</sup>C, drawn with 30% probability ellipsoids.
